# Supplementary material for: Transcriptome-Wide Identification of WRKY Transcription Factors and Their Expression Profiles under Different Types of Biological and Abiotic Stress in Pinus massoniana Lamb
Source: PubMed Central journal article supplement (PMC7700256; doi:10.3390/genes11111386), 2020-11-23
Supplement: genes-11-01386-s001.pdf [file genes-11-01386-s001.pdf]

Article

# Transcriptome-Wide Identification of WRKY Transcription Factors and Their Expression Profiles under Different Types of Biological and Abiotic Stress in *Pinus massoniana* Lamb

Sheng Yao <sup>1</sup>, Fan Wu <sup>1</sup>, Qingqing Hao <sup>1</sup> and Kongshu Ji <sup>1,\*</sup>

Supplementary Materials

**Table S1.** Primer pairs for quantitative polymerase chain reaction.

| Gene ID         | Primer5'→3'               |
|-----------------|---------------------------|
| <i>PmWRKY3</i>  | F: TACAAGGCAGTGAGAAAGAG   |
|                 | R: AGGTGGAGGCAGGAAATTAG   |
| <i>PmWRKY7</i>  | F: TCTGATAATCTCTTCTCGCT   |
|                 | R: GTTCCTGTTCTCGTCGTCCT   |
| <i>PmWRKY13</i> | F: CACAATCATCCCAAACCTCA   |
|                 | R: GAACCATCCACATTCCTTCC   |
| <i>PmWRKY15</i> | F: ACAAAAAGGTGGGAGTAAGG   |
|                 | R: AAATGTGCTAGTAGCGGAGG   |
| <i>PmWRKY17</i> | F: CACAGACACAATATCCCACA   |
|                 | R: TTCACATCACA ACTAGACGA  |
| <i>PmWRKY30</i> | F: TGCTCTGCCCTCATTCTCCC   |
|                 | R: AAATCGCCTTTTCTTCTGCACT |

**Table S2.** Subcellular localization prediction of *PmWRKY* proteins.

| SeqID          | PSORT             | CELLO (reliable-index > 1) | Same result |
|----------------|-------------------|----------------------------|-------------|
| <i>PmWRKY1</i> | nucl: 14          | Nuclear                    | Nuclear     |
| <i>PmWRKY2</i> | nucl: 14          | Nuclear                    | Nuclear     |
| <i>PmWRKY3</i> | nucl: 13, vacu: 1 | Nuclear                    | Nuclear     |

---

|                 |                                                        |         |                        |
|-----------------|--------------------------------------------------------|---------|------------------------|
| <i>PmWRKY4</i>  | nucl: 14                                               | Nuclear | Nuclear                |
| <i>PmWRKY5</i>  | nucl: 10.5, cyto_nucl: 6, mito: 1, plas: 1,<br>cysk: 1 | Nuclear | Nuclear                |
| <i>PmWRKY6</i>  | nucl: 11, chlo: 1, cyto: 1, plas: 1                    | Nuclear | Nuclear                |
| <i>PmWRKY7</i>  | nucl: 12.5, cyto_nucl: 7.5, cyto: 1.5                  | Nuclear | Nuclear                |
| <i>PmWRKY8</i>  | nucl: 13, cyto: 1                                      | Nuclear | Nuclear                |
| <i>PmWRKY9</i>  | nucl: 13, chlo: 1                                      | Nuclear | Nuclear                |
| <i>PmWRKY10</i> | nucl: 14                                               | Nuclear | Nuclear                |
| <i>PmWRKY11</i> | nucl: 8, chlo: 4, cyto: 1, mito: 1                     | Nuclear | Nuclear                |
| <i>PmWRKY12</i> | nucl: 12.5, cyto_nucl: 7, chlo: 1                      | Nuclear | Nuclear                |
| <i>PmWRKY13</i> | nucl: 14                                               | Nuclear | Nuclear                |
| <i>PmWRKY14</i> | nucl: 10.5, cyto_nucl: 6, mito: 1, plas: 1,<br>cysk: 1 | Nuclear | Nuclear                |
| <i>PmWRKY15</i> | cyto: 7, nucl: 3, mito: 2, chlo: 1, extr: 1            | Nuclear | Nuclear<br>Cytoplasmic |
| <i>PmWRKY16</i> | nucl: 7, chlo: 3, mito: 3, extr: 1                     | Nuclear | Nuclear                |
| <i>PmWRKY17</i> | nucl: 11, chlo: 1, extr: 1, vacu: 1                    | Nuclear | Nuclear                |
| <i>PmWRKY18</i> | nucl: 14                                               | Nuclear | Nuclear                |
| <i>PmWRKY19</i> | nucl: 12, cyto: 1, cysk: 1                             | Nuclear | Nuclear                |
| <i>PmWRKY20</i> | chlo: 9, nucl: 5                                       | Nuclear | Nuclear                |
| <i>PmWRKY21</i> | nucl: 14                                               | Nuclear | Nuclear                |
| <i>PmWRKY22</i> | nucl: 14                                               | Nuclear | Nuclear                |
| <i>PmWRKY23</i> | nucl: 10.5, cyto_nucl: 6.5, chlo: 2, cyto: 1.5         | Nuclear | Nuclear                |
| <i>PmWRKY24</i> | nucl: 14                                               | Nuclear | Nuclear                |

---

|                 |                                       |         |         |
|-----------------|---------------------------------------|---------|---------|
| <i>PmWRKY25</i> | nucl: 14                              | Nuclear | Nuclear |
| <i>PmWRKY26</i> | nucl: 12, chlo: 1, plas: 1            | Nuclear | Nuclear |
| <i>PmWRKY27</i> | nucl: 13, chlo: 1                     | Nuclear | Nuclear |
| <i>PmWRKY28</i> | nucl: 12.5, cyto_nucl: 7.5, cyto: 1.5 | Nuclear | Nuclear |
| <i>PmWRKY29</i> | nucl: 13, cyto: 1                     | Nuclear | Nuclear |
| <i>PmWRKY30</i> | nucl: 10, cyto: 3, chlo: 1            | Nuclear | Nuclear |
| <i>PmWRKY31</i> | nucl: 13, cyto: 1                     | Nuclear | Nuclear |

**Table S3.** Homologous genes in *Arabidopsis thaliana*.

| Gene            | Orthologs                                                | Treatment                                                      | Reference |
|-----------------|----------------------------------------------------------|----------------------------------------------------------------|-----------|
| <i>PmWRKY3</i>  | <i>AtWRKY30</i>                                          | heat stress, drought,<br>jasmonic acid                         | [1,2]     |
| <i>PmWRKY7</i>  | <i>AtWRKY55</i>                                          | SA                                                             | [3]       |
| <i>PmWRKY13</i> | <i>AtWRKY44</i>                                          | drought                                                        | [4]       |
| <i>PmWRKY15</i> | <i>AtWRKY21</i> ,<br><i>AtWRKY39</i>                     | osmotic stress, heat<br>stress                                 | [5,6]     |
| <i>PmWRKY17</i> | <i>AtWRKY13</i>                                          | cadmium tolerance                                              | [7]       |
| <i>PmWRKY30</i> | <i>AtWRKY6</i> ,<br><i>AtWRKY42</i> ,<br><i>AtWRKY47</i> | ABA, SA, selenium<br>H <sub>2</sub> O <sub>2</sub> , tolerance | [8,9,10]  |

## References

- El-Esawi, M.A.; Al-Ghamdi, A.A.; Ali, H.M. Overexpression of *AtWRKY30* Transcription Factor Enhances Heat and Drought Stress Tolerance in Wheat (*Triticum aestivum* L.). *Genes* **2019**, *10*, 163.
- Peng, X.X.; Hu, Y.J.; Tang, X.K. Constitutive expression of rice *WRKY30* gene increases the endogenous jasmonic acid accumulation, PR gene expression and resistance to fungal pathogens in rice. *Planta* **2012**, *236*, 1485–1498.
- Wang, Y.Q.; Cui, X.; Yang, B. *WRKY55* transcription factor positively regulates leaf senescence and defense response through modulating the transcription of genes implicated in ROS and SA biosynthesis in *Arabidopsis*. *Development (Cambridge, England)* **2020**, *147*, doi: 10.1242/dev.189647.
- Han, Y.Y.; Zhang, X.; Wang, W. The suppression of *WRKY44* by *GIGANTEA*-miR172 pathway is involved in drought response of *Arabidopsis thaliana*. *PLoS ONE* **2017**, *8*, e73541.
- Zhao, K.X.; Chu, S.S.; Zhang, X.D. *AtWRKY21* negatively regulates tolerance to osmotic stress in *Arabidopsis*. *Environ. Exp. Bot.* **2020**, *169*, 103920.
- Li, S.J.; Zhou, X.; Chen, L.G. Functional characterization of *Arabidopsis thaliana WRKY39* in heat stress. *Mol. Cells* **2010**, *29*, 475–483.
- Sheng, Y.B.; Yan, X.X.; Huang, Y. The *WRKY* transcription factor, *WRKY13*, activates *PDR8* expression to positively regulate cadmium tolerance in *Arabidopsis*. *Plant Cell Environ.* **2019**, *42*, 891–903.

8. Huang, Y.; Feng, C.Z.; Ye, Q. *Arabidopsis* WRKY6 Transcription Factor Acts as a Positive Regulator of Abscisic Acid Signaling during Seed Germination and Early Seedling Development. *PLoS Genet.* **2016**, *12*, e1005833.
9. Niu, F.; Cui, X.; Zhao, P. WRKY42 transcription factor positively regulates leaf senescence through modulating SA and ROS synthesis in *Arabidopsis thaliana*. *Plant J.* **2020**, *104*, 171–184.
10. Wu, X.; Tao, M.; Meng, Y. The role of WRKY47 gene in regulating selenium tolerance in *Arabidopsis thaliana*. *Plant Biotechnol. Rep.* **2020**, *14*, 121–129.

**Publisher's Note:** MDPI stays neutral with regard to jurisdictional claims in published maps and institutional affiliations.

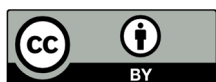

© 2020 by the authors. Licensee MDPI, Basel, Switzerland. This article is an open access article distributed under the terms and conditions of the Creative Commons Attribution (CC BY) license (<http://creativecommons.org/licenses/by/4.0/>).
